# Supplementary material for: Longitudinal evaluation of the impact of traditional rainbow trout farming on receiving water quality in Ireland
Source: PeerJ. 2018 Jul 24;6:e5281. doi: 10.7717/peerj.5281 (PMC6063216; doi:10.7717/peerj.5281)
Supplement: Supplemental Information 1 [file peerj-06-5281-s001.xlsx]

## Sheet: FARM1
		FARM1
			DBO5 (mgO2/L)				ammonium (mgN/L)				nitrite (mgN/L)				Total Oxidised Nitrogen(N) (mgN/L)				orthophosphate (mgP/L)				pH (-)				TSS (mg/L)				temperature (˚C)				turbidity (NTU)				DO (mgO2/L)
			LOQ = 0.1-2 mgO2/L				LOQ = 0.062-0.078 mgN/L				LOQ = 0.01-0.06 mgN/L				LOQ = 0.7 mgN/L				LOQ = 0.01 mgP/L				NA				LOQ = 1 mg/L				NA				LOQ = 1 NTU				NA
			inlet	outlet	R (%)	Δ (mg/L)	inlet	outlet	R (%)	Δ (mg/L)	inlet	outlet	R (%)	Δ (mg/L)	inlet	outlet	R (%)	Δ (mg/L)	inlet	outlet	R (%)	Δ (mg/L)	inlet	outlet	R (%)	Δ	inlet	outlet	R (%)	Δ (mg/L)	inlet	outlet	R (%)	Δ (˚C)	inlet	outlet	R (%)	Δ (NTU)	inlet	outlet	R (%)	Δ (mg/L)
2008-03-01	3		2	2	0	0	0.078	0.11	-41.0256	0.032	0.06	0.06	0	0	1.7	1.7	0	0	0.01	0.02	-100	0.01	7.4	7.1	-	-0.3	2	6	-200	4	6	7	-	1	11	14	-27.2727	3	14.3	13.5	5.59441	-0.8
2008-06-01	6		2	2	0	0	0.078	0.132	-69.2308	0.054	0.06	0.06	0	0	1.7	1.7	0	0	0.03	0.03	0	0	7.1	6.9	-	-0.2	2	1	50	-1	13	13	-	0	2	2	0	0	9.3	9.1	2.15054	-0.2
2008-09-01	9		5	5	0	0	0.078	0.078	0	0	0.06	0.06	0	0	1	1	0	0	0.01	0.02	-100	0.01	6.8	6.8	-	0	4	6	-50	2	13	13	-	0	3	7	-133.333	4	10.4	8.8	15.3846	-1.6
2008-12-01	12
2009-03-01	3		2	3	-50	1	0.078	0.132	-69.2308	0.054	0.06	0.06	0	0	1.6	1.6	0	0	0.01	0.01	0	0	7.1	7	-	-0.1	3	2	33.3333	-1	4	4	-	0	4	2	50	-2	8	6.8	15	-1.2
2009-06-15	6		2	2	0	0	0.078	0.085	-8.97436	0.007	0.06	0.06	0	0	1.4	1.5	-7.14286	0.1	0.01	0.01	0	0	6.7	6.5	-	-0.2	17	35	-105.882	18	14	14	-	0	20	39	-95	19	10.6	8.5	19.8113	-2.1
2009-09-18	9		2	2	0	0	0.078	0.078	0	0	0.06	0.06	0	0	1.7	0.88	48.2353	-0.82	0.01	0.01	0	0	7.2	7.1	-	-0.1	1	2	-100	1	12	12	-	0	1.7	1.4	17.6471	-0.3	10.4	9.8	5.76923	-0.6
2011-01-25	1		2	2	0	0	0.078	0.078	0	0	0.06	0.06	0	0	1.3	2	-53.8462	0.7	0.01	0.01	0	0	6.9	6.6	-	-0.3	2	2	0	0	7	7	-	0	2	2	0	0	11.5	10.2	11.3043	-1.3
2011-04-27	4		2	2	0	0	0.078	0.078	0	0	0.06	0.06	0	0	1.6	1.6	0	0	0.02	0.02	0	0	7	6.9	-	-0.1	1	2	-100	1	11	12	-	1	2	2	0	0	10.8	10.3	4.62963	-0.5
2011-07-26	6		2	2	0	0	0.078	0.078	0	0	0.06	0.06	0	0	1.2	1.2	0	0	0.01	0.03	-200	0.02	7.1	6.7	-	-0.4	2	2	0	0	15	15	-	0	2	2	0	0	9.6	8.3	13.5417	-1.3
2011-10-19	10		2	2	0	0	0.078	0.078	0	0	0.06	0.06	0	0	1.1	1.1	0	0	0.01	0.02	-100	0.01	6.8	6.6	-	-0.2	4	2	50	-2	8	8	-	0	2	2	0	0	10.6	9.7	8.49057	-0.9
2012-01-05	1		2	2	0	0	0.078	0.078	0	0	0.06	0.06	0	0	1.1	1.1	0	0	0.01	0.01	0	0	6.6	6.6	-	0	3	2	33.3333	-1	7	7	-	0	2	2	0	0	10.4	9.9	4.80769	-0.5
2012-04-18	4		3	3	0	0	0.078	0.078	0	0	0.06	0.06	0	0	0.7	0.7	0	0	0.01	0.01	0	0	6.7	6.5	-	-0.2	11	18	-63.6364	7	9	9	-	0	26	33	-26.9231	7	10.6	9.3	12.2642	-1.3
2012-07-16	6		0.1	2	-1900	1.9	0.078	0.109	-39.7436	0.031	0.06	0.06	0	0	1	1.2	-20	0.2	0.01	0.01	0	0	6.8	6.6	-	-0.2	13	12	7.69231	-1	13	13	-	0	11	15	-36.3636	4	9.7	9.4	3.09278	-0.3
2012-11-06	11		2	9	-350	7	0.078	0.24	-207.692	0.162	0.06	0.06	0	0	1.4	1.4	0	0	0.01	0.01	0	0	6.6	6.7	-	0.1	1	1	0	0	13	13	-	0	2	3	-50	1	9.6	9.6	0	0
2013-01-29	1		2	2	0	0	0.078	0.078	0	0	0.06	0.06	0	0	1.8	1.8	0	0	0.01	0.02	-100	0.01	7.3	6.6	-	-0.7	2	3	-50	1	9	9	-	0	2	2	0	0	9.4	9.3	1.06383	-0.1
2013-04-19	4		2	2	0	0	0.078	0.078	0	0	0.06	0.06	0	0	1.4	1.4	0	0	0.01	0.01	0	0	6.8	6.6	-	-0.2	1	1	0	0	9	9	-	0	2	2	0	0	10.4	9.5	8.65385	-0.9
2013-10-02	10		1	2	-100	1	0.062	0.217	-250	0.155	0.01	0.02	-100	0.01	-	-	#VALUE!	#VALUE!	0.05	0.03	40	-0.02	7.7	7.5	-	-0.2	4	7	-75	3	13.5	13.6	-	0.1	3.43	4.34	-26.5306	0.91	10.7	8.3	22.4299	-2.4
LOQ: limit of quantification
NA: not applicable

## Sheet: FARM2
		FARM2
		DBO5 (mgO2/L)				ammonium (mgN/L)				nitrite (mgN/L)				Total Oxidised Nitrogen(N) (mgN/L)				orthophosphate (mgP/L)				pH (-)				TSS (mg/L)				temperature (˚C)				turbidity (NTU)				DO (mgO2/L)
		LOQ = 0.1-2 mgO2/L				LOQ = 0.005-0.078 mgN/L				LOQ = 0.002-0.06 mgN/L				LOQ = 0.7-1 mgN/L				LOQ = 0.006-0.01 mgP/L				NA				LOQ = 0.2-1 mg/L				NA				LOQ = 0.5-1 NTU				NA
		inlet	outlet	R (%)	Δ (mg/L)	inlet	outlet	R (%)	Δ (mg/L)	inlet	outlet	R (%)	Δ (mg/L)	inlet	outlet	R (%)	Δ (mg/L)	inlet	outlet	R (%)	Δ (mg/L)	inlet	outlet	R (%)	Δ	inlet	outlet	R (%)	Δ (mg/L)	inlet	outlet	R (%)	Δ (˚C)	inlet	outlet	R (%)	Δ (NTU)	inlet	outlet	R (%)	Δ (mg/L)
2005-08-18	8	2	2	0	0	0.049	0.156	-218.367	0.107	0.0204	0.0264	-29.4118	0.006	1.74	1.74	0	0	0.022	0.039	-77.2727	0.017	6.87	6.86	-	-0.01	5	5	0	0	15.1	15.2	-	0.1	-	-	#VALUE!	#VALUE!	10	8.3	17	-1.7
2006-07-14	7	0.86	1.16	-34.8837	0.3	0.062	0.173	-179.032	0.111	0.017	0.024	-41.1765	0.007	2.16	2.14	0.925926	-0.02	0.018	0.054	-200	0.036	6.87	6.95	-	0.08	5	5	0	0	13.7	13.6	-	-0.1	-	-	#VALUE!	#VALUE!	10.63	9.22	13.2643	-1.41
2006-11-23	11	2	2.7	-35	0.7	0.02	0.09	-350	0.07	0.01	0.01	0	0	1.34	1.34	0	0	0.0175	0.039	-122.857	0.0215	6.43	6.46	-	0.03	11	12.5	-13.6364	1.5	-	-	-	#VALUE!	-	-	#VALUE!	#VALUE!	-	-	#VALUE!	#VALUE!
2007-04-05	4	1.7	2	-17.6471	0.3	0.021	0.087	-314.286	0.066	0.004	0.006	-50	0.002	2.28	2.24	1.75439	-0.04	0.01	0.013	-30	0.003	6.78	6.94	-	0.16	0	3.5	#DIV/0!	3.5	-	7.2	-	#VALUE!	-	2.5	#VALUE!	#VALUE!	-	11.89	#VALUE!	#VALUE!
2007-07-07	7	1.4	3.4	-142.857	2	0.005	0.248	-4860	0.243	0.007	0.011	-57.1429	0.004	1.58	1.6	-1.26582	0.02	0.016	0.051	-218.75	0.035	6.48	6.43	-	-0.05	0	0	#DIV/0!	0	14	14	-	0	3.8	2.9	23.6842	-0.9	10.7	7.37	31.1215	-3.33
2007-08-02	8	1	6.6	-560	5.6	0.016	0.22	-1275	0.204	0.005	0.01	-100	0.005	2.01	2.04	-1.49254	0.03	0.011	0.038	-245.455	0.027	6.52	6.4	-	-0.12	0	4.5	#DIV/0!	4.5	12.8	13	-	0.2	2.3	10.8	-369.565	8.5	10.44	4.91	52.9693	-5.53
2007-10-04	10	0.9	1.4	-55.5556	0.5	0.107	0.145	-35.514	0.038	0.008	0.01	-25	0.002	0.91	0.87	4.3956	-0.04	0.013	0.016	-23.0769	0.003	6.93	6.91	-	-0.02	2	0	100	-2	-	-	-	#VALUE!	-	-	#VALUE!	#VALUE!	-	-	#VALUE!	#VALUE!
2008-02-28	2	2.2	3.6	-63.6364	1.4	0.021	0.127	-504.762	0.106	0.003	0.007	-133.333	0.004	2.45	2.41	1.63265	-0.04	0.024	0.026	-8.33333	0.002	6.15	6.29	-	0.14	1	6	-500	5	6.3	6.4	-	0.1	-	-	#VALUE!	#VALUE!	12.13	10.27	15.3339	-1.86
2008-03-07	3	2	2	0	0	0.078	0.085	-8.97436	0.007	0.06	0.06	0	0	1.9	1.8	5.26316	-0.1	0.01	0.01	0	0	7.1	7.2	-	0.1	5	2	60	-3	7	7	-	0	3	3	0	0	14.1	13.4	4.96454	-0.7
2008-06-12	6	2	2	0	0	0.43	0.26	39.5349	-0.17	0.16	0.18	-12.5	0.02	1.8	1.8	0	0	0.3	0.15	50	-0.15	7.3	7.1	-	-0.2	5	7	-40	2	13	13	-	0	4	4	0	0	-	-	#VALUE!	#VALUE!
2008-09-15	9	3	5	-66.6667	2	0.078	0.078	0	0	0.06	0.06	0	0	1.2	1.2	0	0	0.01	0.02	-100	0.01	7	6.7	-	-0.3	9	10	-11.1111	1	13	13	-	0	6	4	33.3333	-2	-	-	#VALUE!	#VALUE!
2008-12-03	12	2	2	0	0	0.078	0.225	-188.462	0.147	0.06	0.06	0	0	2.2	2.2	0	0	0.01	0.01	0	0	6.9	6.8	-	-0.1	1	3	-200	2	6	6	-	0	7	7	0	0	-	-	#VALUE!	#VALUE!
2009-03-09	3	2	2	0	0	0.078	0.078	0	0	0.06	0.06	0	0	1.7	1.7	0	0	0.01	0.01	0	0	7.4	7.1	-	-0.3	3	4	-33.3333	1	5	5	-	0	2	3	-50	1	-	-	#VALUE!	#VALUE!
2009-06-15	6	2	5	-150	3	0.078	0.225	-188.462	0.147	0.06	0.06	0	0	1.6	1.7	-6.25	0.1	0.01	0.09	-800	0.08	6.9	6.5	-	-0.4	73	35	52.0548	-38	13	14	-	1	88	30	65.9091	-58	-	-	#VALUE!	#VALUE!
2009-09-18	9	2	2	0	0	0.078	0.078	0	0	0.06	0.06	0	0	1.9	1.5	21.0526	-0.4	0.01	0.02	-100	0.01	7.3	7.1	-	-0.2	2	1	50	-1	12	12	-	0	1.5	1.7	-13.3333	0.2	-	-	#VALUE!	#VALUE!
				#DIV/0!				#DIV/0!				#DIV/0!				#DIV/0!				#DIV/0!				-				#DIV/0!				-				#DIV/0!	0			#DIV/0!	0
2011-07-26	7	2	2	0	0	0.078	0.078	0	0	0.06	0.06	0	0	1.3	1.3	0	0	0.02	0.04	-100	0.02	7.2	6.9	-	-0.3	2	5	-150	3	15	15	-	0	-	-	#VALUE!	#VALUE!	9.4	8.7	7.44681	-0.7
2011-10-11	10	0.8	2.1	-162.5	1.3	0.024	0.232	-866.667	0.208	0.006	0.016	-166.667	0.01	0.93	0.93	0	0	0.01	0.027	-170	0.017	6.56	6.62	-	0.06	0	3	#DIV/0!	3	13.5	13.6	-	0.1	-	-	#VALUE!	#VALUE!	10.11	8.65	14.4411	-1.46
2011-10-19	10	2	2	0	0	0.078	0.078	0	0	0.06	0.06	0	0	1.2	1.2	0	0	0.01	0.01	0	0	6.8	6.8	-	0	4	2	50	-2	9	9	-	0	2	2	0	0	-	-	#VALUE!	#VALUE!
2012-01-05	1	2	3	-50	1	0.078	0.248	-217.949	0.17	0.06	0.06	0	0	1.2	1.1	8.33333	-0.1	0.01	0.06	-500	0.05	6.7	6.4	-	-0.3	2	4	-100	2	7	7	-	0	2	2	0	0	10.4	8.7	16.3462	-1.7
2012-02-16	2	0.5	1.7	-240	1.2	0.035	0.179	-411.429	0.144	0	0.005	#DIV/0!	0.005	2	2	0	0	0.009	0.029	-222.222	0.02	7.14	6.8	-	-0.34	2	3	-50	1	7	7	-	0	1.25	2.11	-68.8	0.86	12.03	8.65	28.0964	-3.38
2012-04-18	4	3	3	0	0	0.078	0.085	-8.97436	0.007	0.06	0.06	0	0	0.7	0.7	0	0	0.01	0.02	-100	0.01	6.8	6.8	-	0	9	5	44.4444	-4	9	9	-	0	28	27	3.57143	-1	10.5	10.3	1.90476	-0.2
2012-07-16	7	3	2	33.3333	-1	0.1	0.1	0	0	0.06	0.06	0	0	1.2	1.5	-25	0.3	0.01	0.02	-100	0.01	7.5	6.9	-	-0.6	16	8	50	-8	13	13	-	0	13	8	38.4615	-5	9.7	8.7	10.3093	-1
2012-11-06	11	2	2	0	0	0.078	0.155	-98.7179	0.077	0.06	0.06	0	0	1.5	1.5	0	0	0.01	0.02	-100	0.01	7	6.6	-	-0.4	1	2	-100	1	12	12	-	0	-	-	#VALUE!	#VALUE!	-	-	#VALUE!	#VALUE!
2013-01-29	1	2	2	0	0	0.078	0.078	0	0	0.06	0.06	0	0	2.4	2.4	0	0	0.01	0.01	0	0	7.1	7	-	-0.1	6	5	16.6667	-1	10	10	-	0	3	3	0	0	9.4	9.4	0	0
2013-04-19	4	2	2	0	0	0.078	0.109	-39.7436	0.031	0.06	0.06	0	0	1.4	1.4	0	0	0.01	0.01	0	0	6.9	6.7	-	-0.2	1	2	-100	1	10	10	-	0	2	2	0	0	-	9.7	#VALUE!	#VALUE!
2013-06-12	6	1.3	1.8	-38.4615	0.5	0.022	0.083	-277.273	0.061	0.004	0.009	-125	0.005	1.641	1.643	-0.121877	0.002	0.011	0.018	-63.6364	0.007	6.29	6.04	-	-0.25	1	4	-300	3	12.7	12.8	-	0.1	2.62	2.56	2.29008	-0.06	10.93	9.43	13.7237	-1.5
2013-08-21	8	1.4	2.1	-50	0.7	0.058	0.128	-120.69	0.07	0.017	0.019	-11.7647	0.002	1.47	1.406	4.35374	-0.064	0.037	0.069	-86.4865	0.032	6.81	6.46	-	-0.35	0	0	#DIV/0!	0	-	-	-	#VALUE!	0.637	0.753	-18.2104	0.116	-	-	#VALUE!	#VALUE!
2013-10-02	10	2	1	50	-1	0.093	0.303	-225.806	0.21	0.04	0.04	0	0			#DIV/0!		0.03	0.05	-66.6667	0.02	7.6	7.4	-	-0.2	3	1	66.6667	-2	14.1	13.8	-	-0.3	2.42	1.94	19.8347	-0.48	10.8	8.8	18.5185	-2
2014-04-10	4	1.1	1.3	-18.1818	0.2	0.012	0.115	-858.333	0.103	0.002	0.004	-100	0.002	2.1	1.91	9.04762	-0.19	0.01	0.02	-100	0.01	6.59	6.39	-	-0.2	2	3	-50	1	-	-	-	#VALUE!	2	3.3	-65	1.3	-	-	#VALUE!	#VALUE!
2014-10-23	10	0.7	2.3	-228.571	1.6	0.035	0.189	-440	0.154	0.005	0.009	-80	0.004	1.59	1.53	3.77358	-0.06	0.006	0.026	-333.333	0.02	6.13	5.95	-	-0.18	4	1	75	-3	10.6	10.9	-	0.3	1.36	5.06	-272.059	3.7	10.85	8.92	17.788	-1.93
2015-02-12	2	0.9	1.7	-88.8889	0.8	0.042	0.182	-333.333	0.14	0.004	0.007	-75	0.003	2.1	2.14	-1.90476	0.04	0.009	0.026	-188.889	0.017	6.68	6.45	-	-0.23	3	7	-133.333	4	5.7	5.7	-	0	3.21	4.37	-36.1371	1.16	12.53	11.17	10.854	-1.36
																				#DIV/0!	0			-	0			#DIV/0!	0			-	0			#DIV/0!	0			#DIV/0!	0
LOQ: limit of quantification
NA: not applicable

## Sheet: FARM3
		FARM3
		DBO5 (mgO2/L)				ammonium (mgN/L)				nitrite (mgN/L)				Total Oxidised Nitrogen(N) (mgN/L)				orthophosphate (mgP/L)				pH (-)				TSS (mg/L)				temperature (˚C)				turbidity (NTU)				DO (mgO2/L)
		LOQ = 0.1-2 mgO2/L				LOQ = 0.005-0.078 mgN/L				LOQ = 0.002-0.06 mgN/L				LOQ = 0.7-1 mgN/L				LOQ = 0.006-0.01 mgP/L				NA				LOQ = 0.2-1 mg/L				NA				LOQ = 0.5-1 NTU				NA
		inlet	outlet	R (%)	Δ (mg/L)	inlet	outlet	R (%)	Δ (mg/L)	inlet	outlet	R (%)	Δ (mg/L)	inlet	outlet	R (%)	Δ (mg/L)	inlet	outlet	R (%)	Δ (mg/L)	inlet	outlet	R (%)	Δ	inlet	outlet	R (%)	Δ (mg/L)	inlet	outlet	R (%)	Δ (˚C)	inlet	outlet	R (%)	Δ (NTU)	inlet	outlet	R (%)	Δ (mg/L)
2005-07-06	7	1.58	2.11	-33.5443	0.53	0.087	0.325	-273.563	0.238	-	-	#VALUE!	#VALUE!	1.83	1.49	18.5792	-0.34	0.041	0.104	-153.659	0.063	6.76	6.72	-	-0.04	5	5	0	0	13	13.6	-	0.6	-	-	#VALUE!	#VALUE!	11.12	6.36	42.8058	-4.76
2005-08-18	8	2	2.66	-33	0.66	0.0658	0.245	-272.34	0.1792	0.0279	0.0435	-55.914	0.0156	1.9	1.91	-0.526316	0.01	0.032	0.072	-125	0.04	6.86	6.85	-	-0.01	5	5	0	0	15.2	15.5	-	0.3	-	-	#VALUE!	#VALUE!	9.4	7	25.5319	-2.4
2006-07-14	7	0.78	0.88	-12.8205	0.1	0.045	0.131	-191.111	0.086	0.027	0.032	-18.5185	0.005	2.37	2.35	0.843882	-0.02	0.023	0.038	-65.2174	0.015	7	6.83	-	-0.17	5	5	0	0	13	14	-	1	-	-	#VALUE!	#VALUE!	-	-	#VALUE!	#VALUE!
2006-11-23	11	2	3.1	-55	1.1	0.02	0.165	-725	0.145	0.01	0.014	-40	0.004	1.77	1.41	20.339	-0.36	0.02	0.073	-265	0.053	6.48	6.23	-	-0.25	9.5	30	-215.789	20.5	8.3	8.2	-	-0.1	-	-	#VALUE!	#VALUE!	-	-	#VALUE!	#VALUE!
2007-04-05	4	1.5	2.6	-73.3333	1.1	0.037	0.2	-440.541	0.163	0.01	0.009	10	-0.001	2.42	2.44	-0.826446	0.02	0.013	0.024	-84.6154	0.011	6.93	6.87	-	-0.06	1.5	4	-166.667	2.5	7.1	7.8	-	0.7	2.2	4.4	-100	2.2	-	-	#VALUE!	#VALUE!
2007-06-07	6	1.4	2.5	-78.5714	1.1	0.035	0.277	-691.429	0.242	0.015	0.029	-93.3333	0.014	1.8	1.8	0	0	0.027	0.061	-125.926	0.034	6.42	6.52	-	0.1	2	2	0	0	13.5	14.2	-	0.7	2.8	5	-78.5714	2.2	10.45	7.47	28.5167	-2.98
2007-08-02	8	1	1.6	-60	0.6	0.029	0.148	-410.345	0.119	0.008	0.012	-50	0.004	2.35	2.13	9.3617	-0.22	0.014	0.024	-71.4286	0.01	6.41	6.54	-	0.13	0.5	1.5	-200	1	13	13.5	-	0.5	4.7	5.3	-12.766	0.6	10.29	7.94	22.8377	-2.35
2007-10-04	10	2.3	2.1	8.69565	-0.2	0.081	0.219	-170.37	0.138	0.01	0.012	-20	0.002	0.95	0.87	8.42105	-0.08	0.016	0.032	-100	0.016	6.9	6.87	-	-0.03	3	13	-333.333	10	10.5	10.9	-	0.4	-	-	#VALUE!	#VALUE!	-	-	#VALUE!	#VALUE!
2008-02-28	2	2.1	3.7	-76.1905	1.6	0.021	0.19	-804.762	0.169	0.004	0.006	-50	0.002	2.63	2.57	2.28137	-0.06	0.011	0.037	-236.364	0.026	6.22	6.43	-	0.21	-	5	#VALUE!	#VALUE!	6.3	6.7	-	0.4	-	-	#VALUE!	#VALUE!	12.2	9.21	24.5082	-2.99
2008-03-07	3	2	2	0	0	0.078	0.078	0	0	0.06	0.06	0	0	2.1	2.2	-4.7619	0.1	0.06	0.01	83.3333	-0.05	7.4	7.4	-	0	5	5	0	0	7	7	-	0	3	4	-33.3333	1	13.5	13.6	-0.740741	0.1
2008-05-07	5	1.2	1.9	-58.3333	0.7	0.039	0.129	-230.769	0.09	0.011	0.01	9.09091	-0.001	2.1	2.08	0.952381	-0.02	0.006	0.018	-200	0.012	6.72	6.66	-	-0.06	5	9	-80	4	12.2	12.8	-	0.6	-	-	#VALUE!	#VALUE!	-	-	#VALUE!	#VALUE!
2008-06-12	6	2	2	0	0	0.078	0.078	0	0	0.12	0.09	25	-0.03	1.9	2	-5.26316	0.1	0.05	0.05	0	0	7.4	7.6	-	0.2	3	4	-33.3333	1	13	13	-	0	3	2	33.3333	-1	9.1	9.2	-1.0989	0.1
2008-08-06	8	1.5	1.9	-26.6667	0.4	0.035	0.176	-402.857	0.141	0.005	0.005	0	0	2.16	1.93	10.6481	-0.23	0.019	0.049	-157.895	0.03	7.29	6.95	-	-0.34	11	3	72.7273	-8	13.7	14	-	0.3	-	-	#VALUE!	#VALUE!	10	7.5	25	-2.5
2008-09-15	9	5	3	40	-2	0.078	0.078	0	0	0.06	0.04	33.3333	-0.02	1.4	1.4	0	0	0.01	0.02	-100	0.01	7	6.9	-	-0.1	7	7	0	0	13	13	-	0	5	7	-40	2	10.5	10.5	0	0
2008-11-05	11	1.2	1.9	-58.3333	0.7	0.019	0.165	-768.421	0.146	0.004	0.008	-100	0.004	2.57	2.33	9.33852	-0.24	0.01	0.028	-180	0.018	6.54	6.53	-	-0.01	5	2	60	-3	9.4	9.4	-	0	-	-	#VALUE!	#VALUE!	11.06	8.97	18.8969	-2.09
2008-12-03	12	2	2	0	0	0.078	0.078	0	0	0.06	0.06	0	0	2.4	2.4	0	0	0.01	0.01	0	0	7.1	7.2	-	0.1	2	2	0	0	6	6	-	0	5	2	60	-3	8.3	7.9	4.81928	-0.4
2009-02-19	2	0.9	1.8	-100	0.9	0.018	0.137	-661.111	0.119	0.003	0.005	-66.6667	0.002	2.57	2.54	1.16732	-0.03	0.008	0.035	-337.5	0.027	7.3	6.99	-	-0.31	5	7	-40	2	6.6	6.6	-	0	3.4	4.77	-40.2941	1.37	12.71	9.85	22.502	-2.86
2009-03-09	3	2	2	0	0	0.078	0.078	0	0	0.06	0.06	0	0	1.9	1.8	5.26316	-0.1	0.01	0.01	0	0	7.5	7.3	-	-0.2	2	1	50	-1	5	5	-	0	3	2	33.3333	-1	8.2	7.8	4.87805	-0.4
2009-05-15	5	1.2	2.2	-83.3333	1	0.028	0.153	-446.429	0.125	0.005	0.008	-60	0.003	2.44	2.17	11.0656	-0.27	0.009	0.036	-300	0.027	6.76	6.61	-	-0.15	2	7	-250	5	9.7	10	-	0.3	2.34	2.7	-15.3846	0.36	11.6	9.18	20.8621	-2.42
2009-06-15	6	2	2	0	0	0.078	0.24	-207.692	0.162	0.06	0.06	0	0	2	2	0	0	0.01	0.01	0	0	7	7	-	0	5	6	-20	1	13	13	-	0	6	9	-50	3	10.1	10.5	-3.9604	0.4
2009-09-18	9	2	2	0	0	0.078	0.078	0	0	0.06	0.06	0	0	1.7	2.1	-23.5294	0.4	0.01	0.01	0	0	7.3	7.4	-	0.1	1	1	0	0	13	13	-	0	1.3	1.4	-7.69231	0.1	10.6	10.4	1.88679	-0.2
2009-11-12	11	1.4	3.3	-135.714	1.9	0.018	0.161	-794.444	0.143	0.007	0.011	-57.1429	0.004	1.31	1.08	17.5573	-0.23	0.036	0.074	-105.556	0.038	6.76	6.47	-	-0.29	17	39	-129.412	22	8.5	8.5	-	0	11.8	28.5	-141.525	16.7	11.4	8.11	28.8596	-3.29
2010-04-15	4	1.4	1.8	-28.5714	0.4	0.016	0.073	-356.25	0.057	0.003	0.001	66.6667	-0.002	2.18	2.07	5.04587	-0.11	0.008	0.016	-100	0.008	7.1	7.6	-	0.5	3	9	-200	6	7.1	7.6	-	0.5	-	-	#VALUE!	#VALUE!	12.28	9.92	19.2182	-2.36
2010-10-28	10	1.6	2.2	-37.5	0.6	0.016	0.222	-1287.5	0.206	0.004	0.009	-125	0.005	1.11	1.15	-3.6036	0.04	0.009	0.027	-200	0.018	6.6	6.53	-	-0.07	3	5	-66.6667	2	10.9	10.9	-	0	2.43	4.8	-97.5309	2.37	11.19	9.04	19.2136	-2.15
2011-01-25	1	2	2	0	0	0.078	0.078	0	0	0.06	0.06	0	0	1.8	2.3	-27.7778	0.5	0.01	0.01	0	0	7	7.1	-	0.1	2	1	50	-1	7	7	-	0	2	2	0	0	10.9	11.6	-6.42202	0.7
2011-04-27	4	2	2	0	0	0.078	0.078	0	0	0.06	0.06	0	0	1.8	1.6	11.1111	-0.2	0.02	0.04	-100	0.02	7.4	6.6	-	-0.8	2	4	-100	2	13	16	-	3	2	3	-50	1	11.3	8.7	23.0088	-2.6
2011-07-26	7	2	2	0	0	0.078	0.078	0	0	0.06	0.06	0	0	1.4	1.3	7.14286	-0.1	0.03	0.05	-66.6667	0.02	7.2	6.9	-	-0.3	7	5	28.5714	-2	15	15	-	0	2	3	-50	1	9.5	8.8	7.36842	-0.7
2011-10-11	10	1.2	2.4	-100	1.2	0.027	0.136	-403.704	0.109	0.007	0.01	-42.8571	0.003	0.93	0.97	-4.30108	0.04	0.014	0.024	-71.4286	0.01	6.94	6.58	-	-0.36	2	0	100	-2	13.6	13.8	-	0.2	-	-	#VALUE!	#VALUE!	10.13	7.38	27.1471	-2.75
2011-10-19	10	2	2	0	0	0.078	0.078	0	0	0.06	0.06	0	0	1.2	1.2	0	0	0.01	0.01	0	0	7	7	-	0	4	4	0	0	9	9	-	0	2	2	0	0	10.4	10.5	-0.961538	0.1
2012-01-05	1	2	2	0	0	0.078	0.078	0	0	0.06	0.06	0	0	1.4	1.3	7.14286	-0.1	0.01	0.01	0	0	6.8	6.9	-	0.1	3	5	-66.6667	2	7	7	-	0	2	2	0	0	10.8	10.4	3.7037	-0.4
2012-02-16	2	0.6	1.1	-83.3333	0.5	0.042	0.135	-221.429	0.093	0.001	0.005	-400	0.004	2.23	2.1	5.8296	-0.13	0.011	0.015	-36.3636	0.004	7.15	6.92	-	-0.23	4	6	-50	2	7.2	7.2	-	0	1.52	3.58	-135.526	2.06	12.06	10.5	12.9353	-1.56
2012-04-18	4	3	3	0	0	0.078	0.078	0	0	0.06	0.06	0	0	0.8	0.7	12.5	-0.1	0.01	0.01	0	0	6.8	6.8	-	0	17	13	23.5294	-4	9	9	-	0	32	32	0	0	10.6	10.6	0	0
2012-07-16	7	2	2	0	0	0.078	0.078	0	0	0.06	0.06	0	0	1.6	1.7	-6.25	0.1	0.01	0.02	-100	0.01	7.6	7.4	-	-0.2	12	8	33.3333	-4	13	13	-	0	12	9	25	-3	9.7	9.6	1.03093	-0.1
2012-11-06	11	2	3	-50	1	0.078	0.186	-138.462	0.108	0.06	0.06	0	0	1.7	1.7	0	0	0.01	0.02	-100	0.01	7	6.7	-	-0.3	2	4	-100	2	13	13	-	0	3	2	33.3333	-1	9.6	9.5	1.04167	-0.1
2013-01-29	1	2	2	0	0	0.078	0.16	-105.128	0.082	0.06	0.06	0	0	2.4	2.1	12.5	-0.3	0.01	0.02	-100	0.01	7.1	6.8	-	-0.3	6	10	-66.6667	4	10	10	-	0	3	3	0	0	9.4	9.2	2.12766	-0.2
2013-04-19	4	2	2	0	0	0.078	0.078	0	0	0.06	0.06	0	0	1.7	1.6	5.88235	-0.1	0.01	0.01	0	0	7.2	7	-	-0.2	3	2	33.3333	-1	10	10	-	0	3	3	0	0	9.7	11.1	-14.433	1.4
2013-06-12	6	1.2	3.5	-191.667	2.3	0.039	0.242	-520.513	0.203	0.008	0.018	-125	0.01	1.71	1.71	0	0	0.013	0.036	-176.923	0.023	6.4	6.1	-	-0.3	0	4	#DIV/0!	4	12.8	13.3	-	0.5	1.09	1.2	-10.0917	0.11	10.8	8.57	20.6481	-2.23
2013-08-21	8	0.9	2.6	-188.889	1.7	0.04	0.321	-702.5	0.281	0.023	0.057	-147.826	0.034	1.5	1.61	-7.33333	0.11	0.017	0.06	-252.941	0.043	6.76	6.45	-	-0.31	0	0	#DIV/0!	0	-	-	-	#VALUE!	0.526	1.14	-116.73	0.614	-	-	#VALUE!	#VALUE!
2013-10-02	10	1	2	-100	1	0.047	0.248	-427.66	0.201	0.04	0.04	0	0	-	-	#VALUE!	#VALUE!	0.09	0.35	-288.889	0.26	7.6	7.4	-	-0.2	1	1	0	0	13.8	14	-	0.2	0.4	0.41	-2.5	0.01	11.3	8.1	28.3186	-3.2
2014-04-10	4	0.9	1.4	-55.5556	0.5	0.019	0.137	-621.053	0.118	0.002	0.004	-100	0.002	2.16	2	7.40741	-0.16	0.014	0.026	-85.7143	0.012	6.61	6.41	-	-0.2	0	3	#DIV/0!	3	-	-	-	#VALUE!	2.52	3.11	-23.4127	0.59	-	-	#VALUE!	#VALUE!
2014-10-23	10	0.8	2.2	-175	1.4	0.035	0.203	-480	0.168	0.006	0.007	-16.6667	0.001	1.85	1.75	5.40541	-0.1	0.006	0.023	-283.333	0.017	6.22	6.05	-	-0.17	3	9	-200	6	10.9	10.8	-	-0.1	1.82	3.7	-103.297	1.88	10.84	7.25	33.1181	-3.59
2015-02-12	2	1.3	2.5	-92.3077	1.2	0.081	0.297	-266.667	0.216	0.01	0.012	-20	0.002	2.1	2	4.7619	-0.1	0.016	0.036	-125	0.02	6.65	6.43	-	-0.22	4	4	0	0	5.7	5.5	-	-0.2	4.1	3.26	20.4878	-0.84	12.62	10.59	16.0856	-2.03
LOQ: limit of quantification
NA: not applicable

## Sheet: FARM4
		FARM4
		DBO5 (mgO2/L)				ammonium (mgN/L)				nitrite (mgN/L)				Total Oxidised Nitrogen(N) (mgN/L)				orthophosphate (mgP/L)				pH (-)				TSS (mg/L)				temperature (˚C)				turbidity (NTU)				DO (mgO2/L)
		LOQ = 0.1-2 mgO2/L				LOQ = 0.005-0.078 mgN/L				LOQ = 0.002-0.06 mgN/L				LOQ = 0.7-1 mgN/L				LOQ = 0.006-0.01 mgP/L				NA				LOQ = 0.2-1 mg/L				NA				LOQ = 0.5-1 NTU				NA
		inlet	outlet	R (%)	Δ (mg/L)	inlet	outlet	R (%)	Δ (mg/L)	inlet	outlet	R (%)	Δ (mg/L)	inlet	outlet	R (%)	Δ (mg/L)	inlet	outlet	R (%)	Δ (mg/L)	inlet	outlet	R (%)	Δ	inlet	outlet	R (%)	Δ (mg/L)	inlet	outlet	R (%)	Δ (˚C)	inlet	outlet	R (%)	Δ (NTU)	inlet	outlet	R (%)	Δ (mg/L)
2005-07-06	7	2	2.94	-47	0.94	0.141	0.357	-153.191	0.216	-	-	#VALUE!	#VALUE!	1.8	1.32	26.6667	-0.48	0.051	0.104	-103.922	0.053	6.78	6.75	-	-0.03	5	7	-40	2	13.4	13.7	-	0.3	-	-	#VALUE!	#VALUE!	9.65	7.53	21.9689	-2.12
2005-08-18	8	2	2.14	-7	0.14	0.095	0.28	-194.737	0.185	0.033	0.0443	-34.2424	0.0113	1.96	2.07	-5.61224	0.11	0.043	0.071	-65.1163	0.028	6.8	6.83	-	0.03	5	5	0	0	15.3	15.6	-	0.3	-	-	#VALUE!	#VALUE!	9	6.5	27.7778	-2.5
2006-07-14	7	1.22	1.28	-4.91803	0.06	0.087	0.209	-140.23	0.122	0.031	0.039	-25.8065	0.008	2.42	2.24	7.43802	-0.18	0.034	0.051	-50	0.017	6.8	6.52	-	-0.28	5	5	0	0	14	14.1	-	0.1	1.7	0.04	97.6471	-1.66	-	8.61	#VALUE!	#VALUE!
2006-11-23	11	2	3.3	-65	1.3	0.024	0.096	-300	0.072	0.01	0.014	-40	0.004	1.5	1.35	10	-0.15	0.0198	0.047	-137.374	0.0272	6.58	6.54	-	-0.04	14	34.5	-146.429	20.5	8.4	8.2	-	-0.2	-	-	#VALUE!	#VALUE!	-	-	#VALUE!	#VALUE!
2007-04-05	4	2.5	2.6	-4	0.1	0.064	0.143	-123.437	0.079	0.011	0.0106	3.63636	-0.0004	2.63	2.49	5.32319	-0.14	0.021	0.024	-14.2857	0.003	6.9	6.7	-	-0.2	31.5	9.5	69.8413	-22	7.8	7.9	-	0.1	14.2	5.5	61.2676	-8.7	-	-	#VALUE!	#VALUE!
2007-07-07	7	1.6	1.3	18.75	-0.3	0.135	0.314	-132.593	0.179	0.024	0.029	-20.8333	0.005	1.89	1.8	4.7619	-0.09	0.041	0.065	-58.5366	0.024	6.51	6.47	-	-0.04	3	2	33.3333	-1	14.4	14.9	-	0.5	3.2	9.7	-203.125	6.5	9.55	7.1	25.6545	-2.45
2007-08-02	8	1.3	2	-53.8462	0.7	0.05	0.169	-238	0.119	0.01	0.015	-50	0.005	2.34	2.19	6.41026	-0.15	0.017	0.026	-52.9412	0.009	6.61	6.6	-	-0.01	1	4.5	-350	3.5	13.3	13.5	-	0.2	3.1	6.1	-96.7742	3	10.05	8.65	13.9303	-1.4
2007-10-04	10	1.5	2.1	-40	0.6	0.094	0.249	-164.894	0.155	0.01	0.015	-50	0.005	0.96	0.88	8.33333	-0.08	0.017	0.029	-70.5882	0.012	6.77	6.75	-	-0.02	2	4	-100	2	10.8	11.1	-	0.3	-	-	#VALUE!	#VALUE!	-	-	#VALUE!	#VALUE!
2008-02-28	2	2.1	2.8	-33.3333	0.7	0.071	0.239	-236.62	0.168	0.005	0.008	-60	0.003	2.56	2.57	-0.390625	0.01	0.019	0.043	-126.316	0.024	9.47	6.45	-	-3.02	2	-	#VALUE!	#VALUE!	6.5	6.6	-	0.1	-	-	#VALUE!	#VALUE!	11.39	7.9	30.6409	-3.49
2008-03-07	3	2	2	0	0	0.27	0.078	71.1111	-0.192	0.06	0.06	0	0	2.3	11	-378.261	8.7	0.05	0.01	80	-0.04	7.2	7.2	-	0	11	5	54.5455	-6	-	-	-	#VALUE!	5	6	-20	1	12.2	13,3	#VALUE!	#VALUE!
2008-05-07	5	1.4	1.8	-28.5714	0.4	0.064	0.123	-92.1875	0.059	0.011	0.015	-36.3636	0.004	2.17	20.6	-849.309	18.43	0.012	0.02	-66.6667	0.008	6.78	6.78	-	0	4	11	-175	7	12.9	13.3	-	0.4	-	-	#VALUE!	#VALUE!	-	-	#VALUE!	#VALUE!
2008-06-12	6	2	2	0	0	0.116	0.116	0	0	0.1	0.26	-160	0.16	1.8	2	-11.1111	0.2	0.05	0.16	-220	0.11	6.9	7.1	-	0.2	2	9	-350	7	13	13	-	0	3	3	0	0	8.2	8.4	-2.43902	0.2
2008-08-06	8	1.6	2.4	-50	0.8	0.06	0.185	-208.333	0.125	0.006	0.009	-50	0.003	1.81	1.77	2.20994	-0.04	0.022	0.052	-136.364	0.03	7.25	6.96	-	-0.29	3	1	66.6667	-2	14.1	14.2	-	0.1	-	-	#VALUE!	#VALUE!	9.7	8.14	16.0825	-1.56
2008-09-15	9	2	2	0	0	0.078	0.078	0	0	0.06	0.06	0	0	1.1	1.1	0	0	0.01	0.03	-200	0.02	6.9	6.8	-	-0.1	5	8	-60	3	13	13	-	0	11	10	9.09091	-1	10.2	8.6	15.6863	-1.6
2008-11-05	11	1.4	2.8	-100	1.4	0.041	0.257	-526.829	0.216	0.005	0.01	-100	0.005	2.42	2.24	7.43802	-0.18	0.012	0.039	-225	0.027	6.56	6.46	-	-0.1	3	4	-33.3333	1	9.4	9.4	-	0	-	-	#VALUE!	#VALUE!	11.06	8.63	21.9711	-2.43
2008-12-03	12	4	3	25	-1	0.078	0.225	-188.462	0.147	0.06	0.06	0	0	2.3	2.3	0	0	0.01	0.03	-200	0.02	7	7	-	0	2	7	-250	5	6	6	-	0	2	3	-50	1	7.8	6.7	14.1026	-1.1
2009-02-19	2	1.2	3	-150	1.8	0.036	0.118	-227.778	0.082	0.004	0.007	-75	0.003	2.54	2.51	1.1811	-0.03	0.01	0.031	-210	0.021	7.21	6.99	-	-0.22	1	4	-300	3	6.6	6.7	-	0.1	2.75	3.73	-35.6364	0.98	12.44	10.06	19.1318	-2.38
2009-03-09	3	2	2	0	0	0.14	0.116	17.1429	-0.024	0.06	0.06	0	0	1.8	1.8	0	0	0.02	0.02	0	0	7.2	7.1	-	-0.1	3	2	33.3333	-1	6	6	-	0	2	3	-50	1	7.6	7	7.89474	-0.6
2009-05-13	5	1.8	2.5	-38.8889	0.7	0.069	0.213	-208.696	0.144	0.007	0.011	-57.1429	0.004	2.33	2.1	9.87124	-0.23	0.018	0.054	-200	0.036	6.76	6.41	-	-0.35	3	4	-33.3333	1	9.9	10.1	-	0.2	2.91	2.95	-1.37457	0.04	11.25	8.13	27.7333	-3.12
2009-06-15	6	2	2	0	0	0.078	0.225	-188.462	0.147	0.06	0.06	0	0	1.5	1.9	-26.6667	0.4	0.05	0.05	0	0	6.4	6.6	-	0.2	5	5	0	0	14	13	-	-1	9	9	0	0	7.4	8.6	-16.2162	1.2
2009-09-18	9	2	2	0	0	0.078	0.078	0	0	0.06	0.06	0	0	1.6	1.3	18.75	-0.3	0.01	0.03	-200	0.02	7.2	7.2	-	0	2	5	-150	3	12	12	-	0	1.6	2.3	-43.75	0.7	10.2	9.5	6.86275	-0.7
2009-11-12	11	1.7	6.1	-258.824	4.4	0.031	0.225	-625.806	0.194	0.008	0.013	-62.5	0.005	1.15	1.11	3.47826	-0.04	0.046	0.097	-110.87	0.051	6.76	6.5	-	-0.26	42	55	-30.9524	13	8.6	8.6	-	0	22.1	31.2	-41.1765	9.1	11.16	9.22	17.3835	-1.94
2010-04-15	4	1.3	1.6	-23.0769	0.3	0.036	0.08	-122.222	0.044	0.009	0.002	77.7778	-0.007	2.09	2.17	-3.82775	0.08	0.008	0.014	-75	0.006	6.97	6.91	-	-0.06	5	3	40	-2	7.6	7.9	-	0.3	-	-	#VALUE!	#VALUE!	11.66	10.45	10.3774	-1.21
2010-10-28	10	-	2.4	#VALUE!	#VALUE!	-	0.144	#VALUE!	#VALUE!	-	0.009	#VALUE!	#VALUE!	-	1.12	#VALUE!	#VALUE!	-	0.025	#VALUE!	#VALUE!	-	6.59	-	#VALUE!	-	3	#VALUE!	#VALUE!	-	9.3	-	#VALUE!	-	3.41	#VALUE!	#VALUE!	-	8.99	#VALUE!	#VALUE!
2011-01-25	1	2	2	0	0	0.078	0.1	-28.2051	0.022	0.06	0.06	0	0	1.2	2	-66.6667	0.8	0.01	0.01	0	0	6.8	6.8	-	0	1	4	-300	3	7	6	-	-1	2	2	0	0	10.4	10.2	1.92308	-0.2
2011-04-27	4	2	2	0	0	0.14	0.078	44.2857	-0.062	0.06	0.06	0	0	1.7	1.8	-5.88235	0.1	0.04	0.08	-100	0.04	7.2	7.1	-	-0.1	4	8	-100	4	13	14	-	1	2	3	-50	1	9.8	10.3	-5.10204	0.5
2011-07-26	7	6	2	66.6667	-4	0.078	0.078	0	0	0.06	0.06	0	0	1.4	1.4	0	0	0.02	0.04	-100	0.02	7	6.9	-	-0.1	5	4	20	-1	15	15	-	0	3	3	0	0	9	8.1	10	-0.9
2011-10-11	10	1	3.2	-220	2.2	0.046	0.232	-404.348	0.186	0.007	0.013	-85.7143	0.006	0.95	0.97	-2.10526	0.02	0.015	0.035	-133.333	0.02	6.76	6.53	-	-0.23	2	4	-100	2	13.8	13.9	-	0.1	-	-	#VALUE!	#VALUE!	9.68	6.3	34.9174	-3.38
2011-10-19	10	5	3	40	-2	0.078	0.078	0	0	0.06	0.06	0	0	1.1	1.2	-9.09091	0.1	0.01	0.01	0	0	6.8	6.7	-	-0.1	4	2	50	-2	9	9	-	0	2	2	0	0	10.1	9.2	8.91089	-0.9
2012-01-05	1	2	2	0	0	0.078	0.109	-39.7436	0.031	0.06	0.06	0	0	1.3	1.2	7.69231	-0.1	0.01	0.02	-100	0.01	6.8	6.5	-	-0.3	2	6	-200	4	7	7	-	0	2	2	0	0	10.6	8.8	16.9811	-1.8
2012-02-16	2	0.5	1.2	-140	0.7	0.054	0.116	-114.815	0.062	0.001	0.004	-300	0.003	2.23	2.21	0.896861	-0.02	0.012	0.021	-75	0.009	7.14	6.97	-	-0.17	4	2	50	-2	7.2	7.3	-	0.1	2.32	2.63	-13.3621	0.31	11.84	9.97	15.7939	-1.87
2012-04-18	4	2	3	-50	1	0.078	0.078	0	0	0.06	0.06	0	0	0.9	0.7	22.2222	-0.2	0.01	0.01	0	0	6.8	6.8	-	0	6	14	-133.333	8	10	9	-	-1	25	34	-36	9	10	9.5	5	-0.5
2012-07-16	7	2	2	0	0	0.078	0.078	0	0	0.06	0.06	0	0	1.8	1.8	0	0	0.01	0.03	-200	0.02	7.6	7.2	-	-0.4	2	7	-250	5	13	13	-	0	4	4	0	0	9.6	8.9	7.29167	-0.7
2012-11-06	11	2	2	0	0	0.078	0.116	-48.7179	0.038	0.06	0.06	0	0	1.6	1.6	0	0	0.01	0.02	-100	0.01	7	6.7	-	-0.3	1	7	-600	6	12	12	-	0	5	7	-40	2	9.3	9.3	0	0
2013-01-29	1	2	2	0	0	0.078	0.148	-89.7436	0.07	0.06	0.06	0	0	2	2	0	0	0.01	0.03	-200	0.02	7.4	6.9	-	-0.5	9	6	33.3333	-3	10	10	-	0	4	3	25	-1	9.5	9.2	3.15789	-0.3
2013-04-19	4	2	2	0	0	0.078	0.078	0	0	0.06	0.06	0	0	1.6	1.6	0	0	0.01	0.01	0	0	7.1	7	-	-0.1	4	2	50	-2	10	10	-	0	2	2	0	0	11.5	11.1	3.47826	-0.4
2013-06-12	6	2.8	3.2	-14.2857	0.4	0.103	0.237	-130.097	0.134	0.014	0.019	-35.7143	0.005	1.77	1.78	-0.564972	0.01	0.02	0.036	-80	0.016	6.4	6.59	-	0.19	1	6	-500	5	13.2	13.4	-	0.2	1.36	1.27	6.61765	-0.09	10.4	7.86	24.4231	-2.54
2013-08-21	8	1.9	2.6	-36.8421	0.7	0.212	0.332	-56.6038	0.12	0.061	0.075	-22.9508	0.014	1.71	1.69	1.16959	-0.02	0.045	0.053	-17.7778	0.008	6.55	6.47	-	-0.08	0	2	#DIV/0!	2	-	-	-	#VALUE!	0.801	1.32	-64.794	0.519	-	-	#VALUE!	#VALUE!
2013-10-02	10	1	2	-100	1	0.148	0.241	-62.8378	0.093	0.04	0.05	-25	0.01	-	-	#VALUE!	#VALUE!	0.05	0.05	0	0	7.6	7.6	-	0	1	1	0	0	13.9	13.9	-	0	0.33	0.4	-21.2121	0.07	9.5	6.3	33.6842	-3.2
2014-04-10	4	1.1	1.5	-36.3636	0.4	0.035	0.143	-308.571	0.108	0.003	0.005	-66.6667	0.002	1.98	2	-1.0101	0.02	0.018	0.029	-61.1111	0.011	6.58	6.47	-	-0.11	0	3	#DIV/0!	3	-	-	-	#VALUE!	1.92	2.32	-20.8333	0.4	-	-	#VALUE!	#VALUE!
2014-10-23	10	1	1.8	-80	0.8	0.052	0.195	-275	0.143	0.006	0.009	-50	0.003	1.88	1.81	3.7234	-0.07	0.009	0.021	-133.333	0.012	6.19	5.95	-	-0.24	3	5	-66.6667	2	11	10.9	-	-0.1	2.01	2.61	-29.8507	0.6	10.55	7.39	29.9526	-3.16
2015-02-12	2	1.4	2.3	-64.2857	0.9	0.141	0.302	-114.184	0.161	0.013	0.012	7.69231	-0.001	2.14	2.15	-0.46729	0.01	0.026	0.034	-30.7692	0.008	6.6	6.45	-	-0.15	6	5	16.6667	-1	5.5	5.5	-	0	2.57	3.1	-20.6226	0.53	12.14	10.04	17.2982	-2.1
LOQ: limit of quantification
NA: not applicable
